# Supplementary material
Source: Springer Nature journal article supplement (https://www.springermedizin.de/resource/supplementary/13058_2011_2846_MOESM5_ESM.pdf/9702476)

**A****BT474 Passage 1**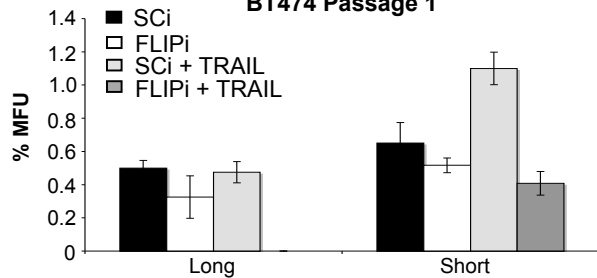**BT474 Passage 2**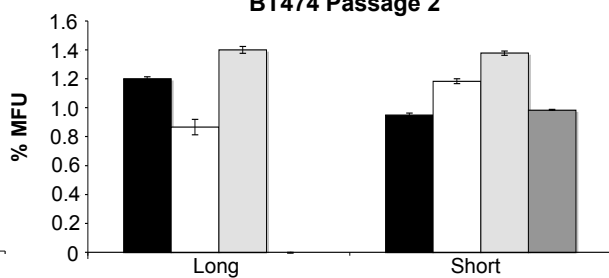**MDA-MB-231 Passage 1**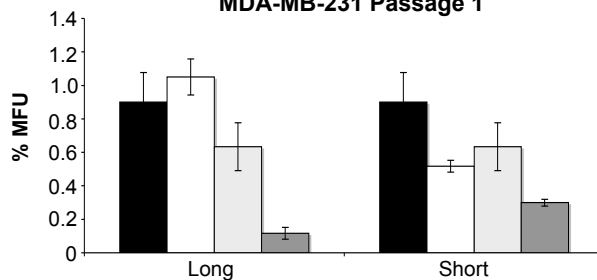**MDA-MB-231 Passage 2**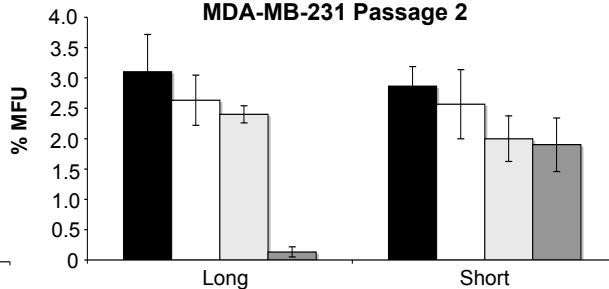

Sci

Sci + TRAIL

FLIPi<sub>L</sub>FLIPi<sub>S</sub>FLIPi<sub>S</sub> + TRAILFLIPi<sub>L</sub> + TRAIL**BT474**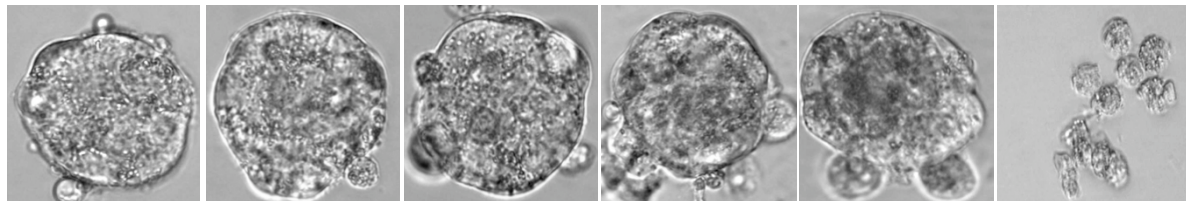

Supplement: MOESM5 [file 9702476]
